# Supplementary material
Source: Royal Society of Chemistry journal article supplement (doi:10.1039/d6nj00222f)
Supplement: d6nj00222f1.pdf [file d6nj00222f1.pdf]

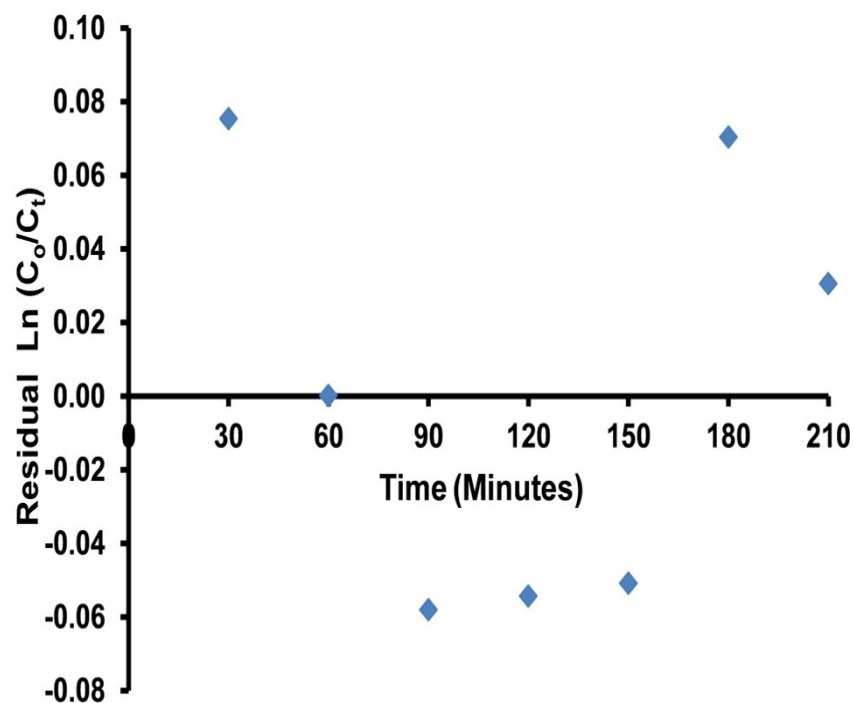

**Figure S1.** Residual plot for the pseudo-first order adsorption kinetics of CPF on WSA

(Experimental conditions: Adsorbent mass = 1 g; CPF concentration = 40 ppm; solution volume = 100 mL; contact time varied from 30 to 210 minutes; temperature =  $60 \pm 1$  °C; pH = 2; stirring speed = 200 rpm)

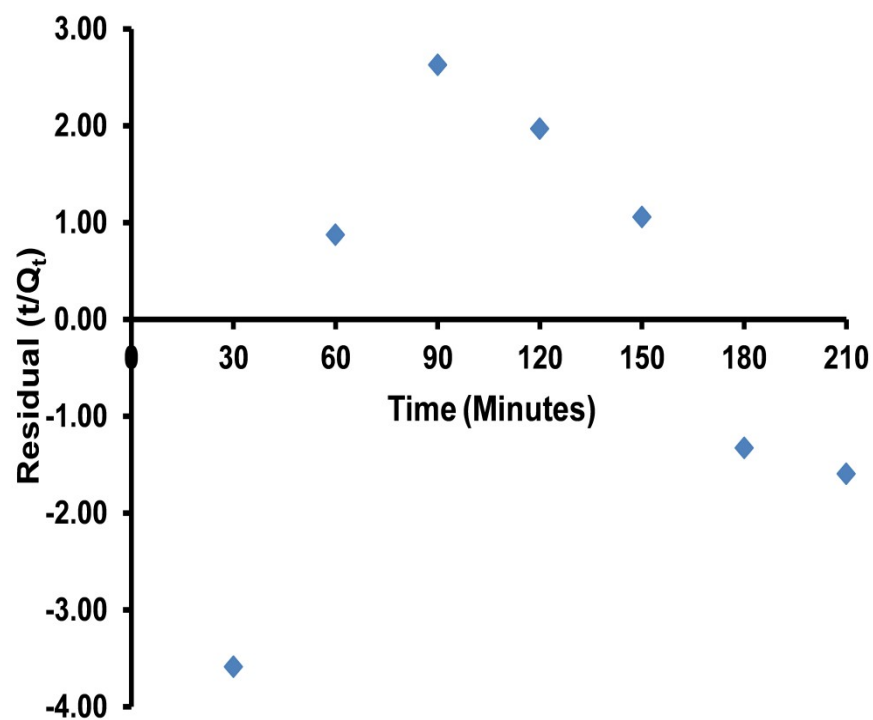

**Figure S2.** Residual plot for the pseudo-second order adsorption kinetics of CPF on WSA

(Experimental conditions: Adsorbent mass = 1 g; CPF concentration = 40 ppm; solution volume = 100 mL; contact time varied from 30 to 210 minutes; temperature =  $60 \pm 1$  °C; pH = 2; stirring speed = 200 rpm)

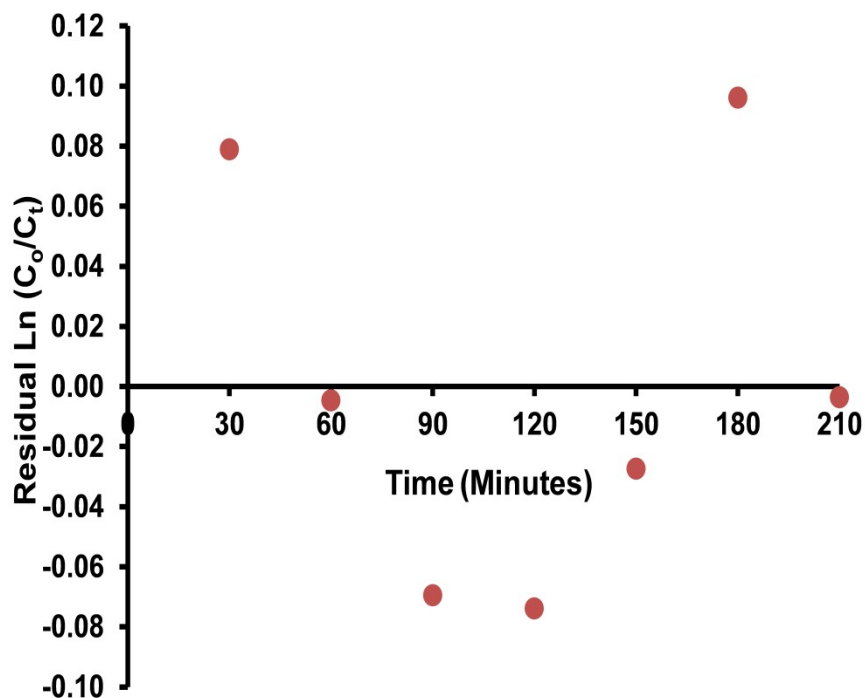

**Figure S3.** Residual plot for the pseudo-first order adsorption kinetics of CPF on WSB  
*(Experimental conditions: Adsorbent mass = 1 g; CPF concentration = 40 ppm; solution volume = 100 mL; contact time varied from 30 to 210 minutes; temperature = 60 ± 1 °C; pH = 2; stirring speed = 200 rpm)*

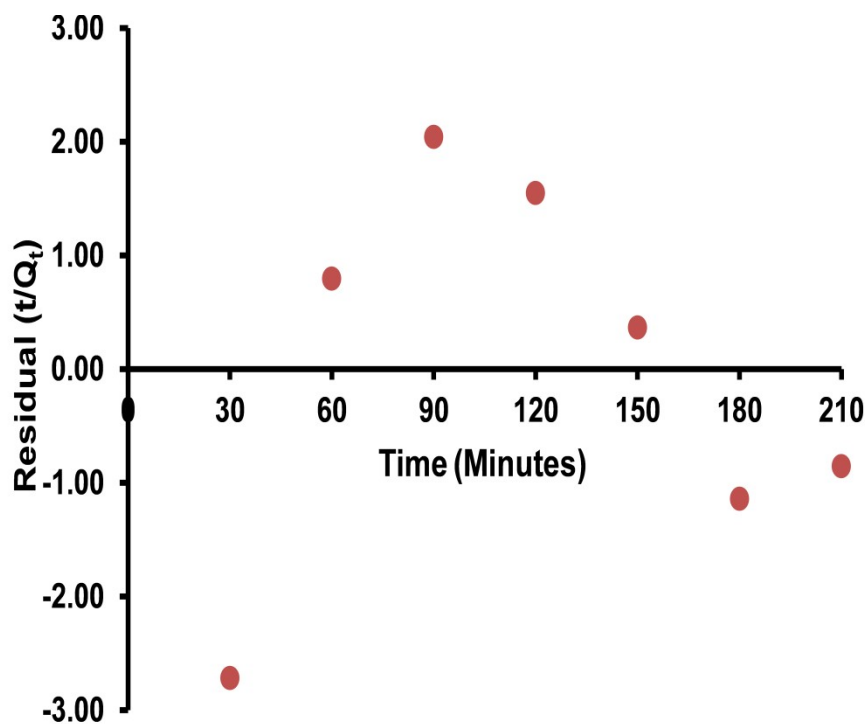

**Figure S4.** Residual plot for the pseudo-second order adsorption kinetics of CPF on WSB  
*(Experimental conditions: Adsorbent mass = 1 g; CPF concentration = 40 ppm; solution volume = 100 mL; contact time varied from 30 to 210 minutes; temperature = 60 ± 1 °C; pH = 2; stirring speed = 200 rpm)*

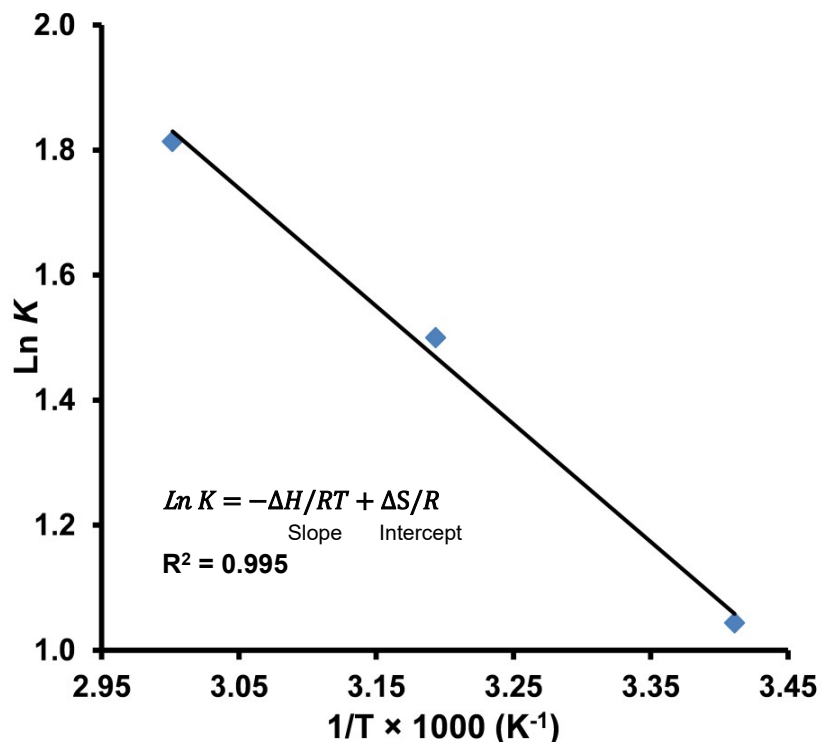

**Figure S5.** Graph of the Van't Hoff equation for the adsorption of CPF on WSA

(Experimental conditions: Adsorbent mass = 1 g; CPF concentration = 40 ppm; solution volume = 100 mL; contact time = 180 minutes; temperatures varied from 20 to 60 °C; pH = 2; stirring speed = 200 rpm)

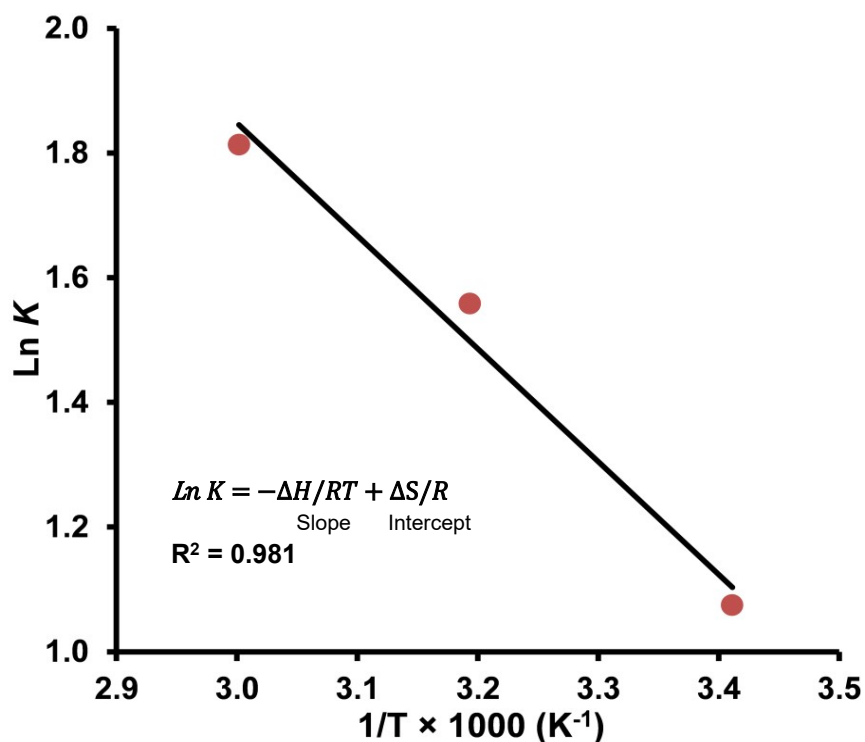

**Figure S6.** Graph of the Van't Hoff equation for the adsorption of CPF on WSB

(Experimental conditions: Adsorbent mass = 1 g; CPF concentration = 40 ppm; solution volume = 100 mL; contact time = 180 minutes; temperatures varied from 20 to 60 °C; pH = 2; stirring speed = 200 rpm)
